# Supplementary material for: A novel strategy for sensitive and rapid detection of ascorbic acid via the Tyndall effect of cobalt hydroxide nanoflakes
Source: Royal Society of Chemistry journal article supplement (doi:10.1039/d1ra07702c), 2021-01-01
Supplement: d1ra07702c1.pdf [file d1ra07702c1.pdf]

Electronic Supplementary Information

**A novel strategy for sensitive and rapid detection of ascorbic acid via  
the Tyndall effect of cobalt hydroxide nanoflakes**

Qian Gao, Jing Wan, Xuejiang Chen, Xiaomei Mo, Yao Sun, Jianmei Zou,\* Jinfang

Nie and Yun Zhang \*

*College of Chemistry and Bioengineering, Guilin University of Technology, Guilin*

*541004, P. R. China*

\* Corresponding Author.

E-mail: 2019136@glut.edu.cn, zy@glut.edu.cn.

Tel: +86 773 5896453; Fax: +86 773 5896839.

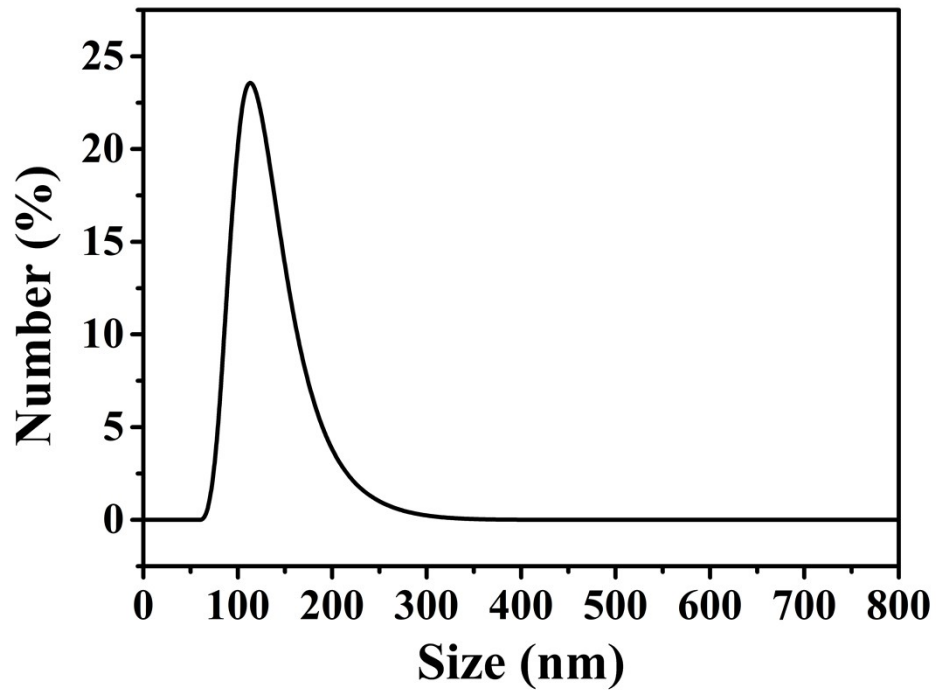

Fig. S1 Dynamic light scattering (DLS) result of the prepared CoOOH nanoflakes.

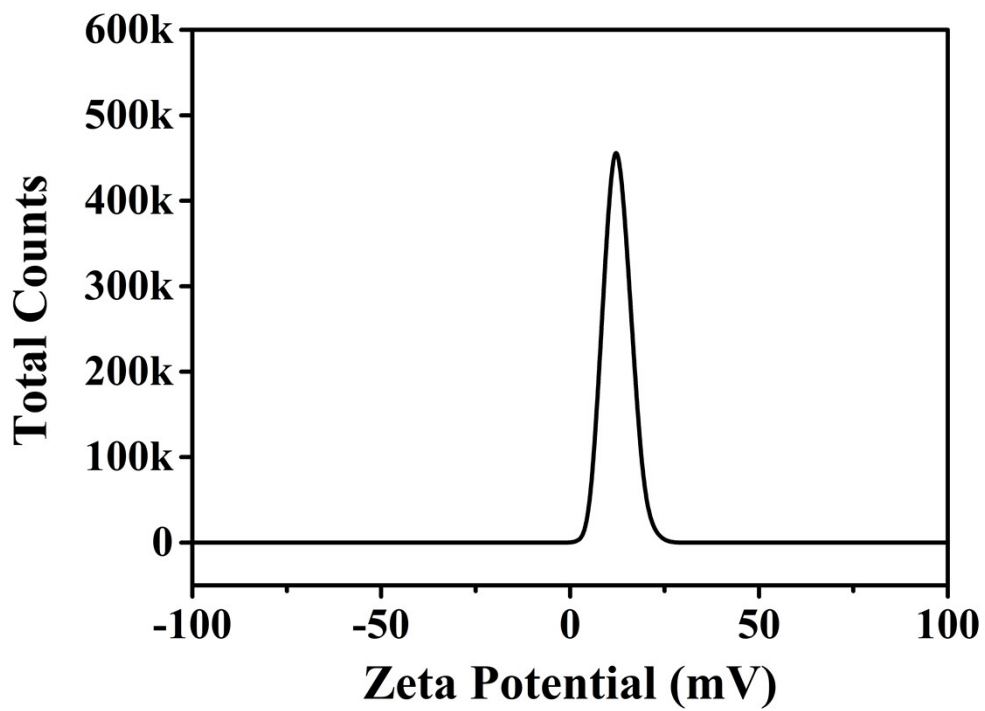

Fig. S2 Zeta-Potential of Values of the prepared CoOOH nanoflakes.

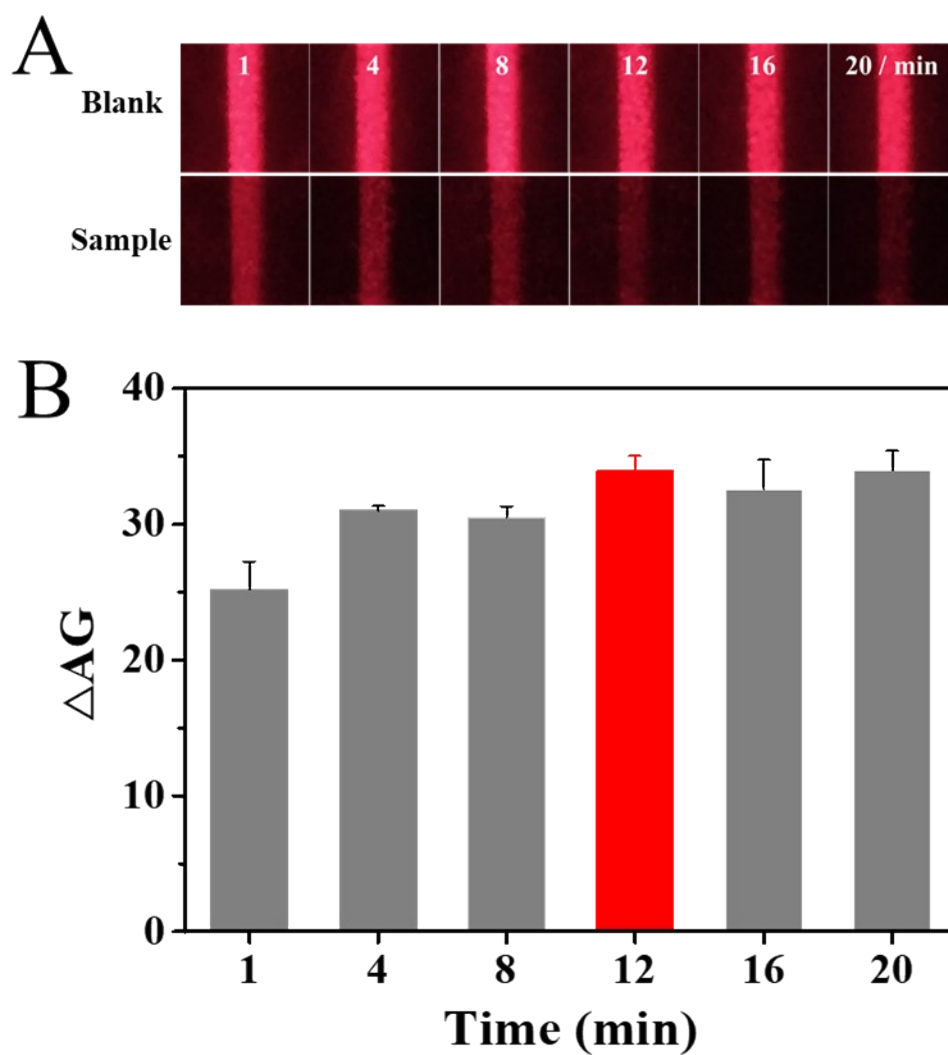

**Fig. S3** (A) The TE images obtained from the 2.5  $\mu\text{g}/\text{mL}$  CoOOH nanoflakes solution incubated without or with 10  $\mu\text{M}$  AA for different time (1, 4, 8, 12, 16 and 20 minutes). (B) The average grayscale change ( $\Delta AG$ ) of the TE images shown in (A). Each error bar represents a standard deviation across three replicate experiments.

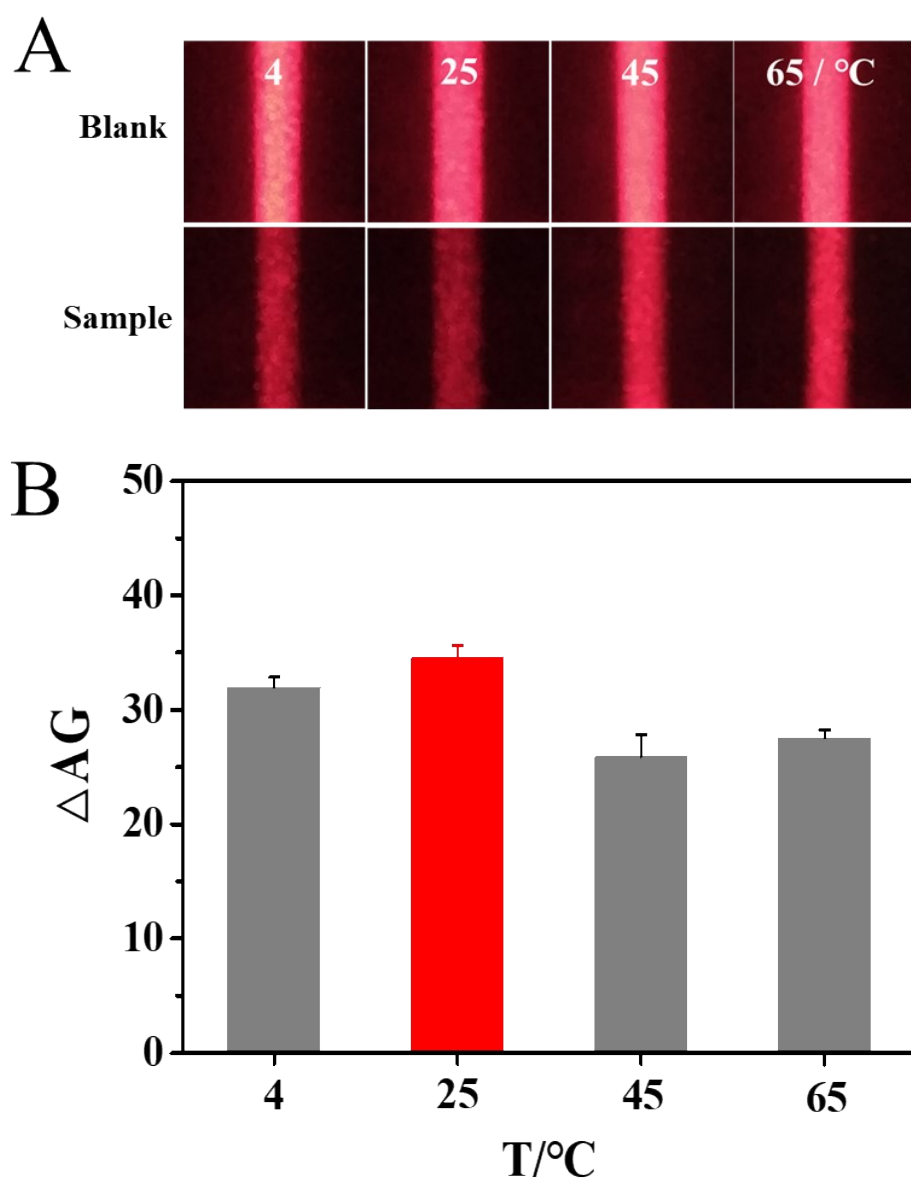

**Fig. S4** (A) The TE images obtained from the 2.5  $\mu\text{g/mL}$  CoOOH nanoflakes solution incubated without or with 10  $\mu\text{M}$  AA at different temperature (4, 25, 45 and 60  $^\circ\text{C}$ ). (B) The average grayscale change ( $\Delta AG$ ) of the TE images shown in (A). Each error bar represents a standard deviation across three replicate experiments.

**Table S1** Comparison of the new AA assay with some previous nanoprobe-based colorimetric technology.

| Materials                          | Detection method | Detection range<br>( $\mu\text{M}$ ) | LOD<br>( $\mu\text{M}$ ) | Reference |
|------------------------------------|------------------|--------------------------------------|--------------------------|-----------|
| $\text{Co}_3\text{O}_4/\text{CGM}$ | Colorimetry      | 30 - 140                             | 0.19                     | S1        |
| Cu-Ag/rGO                          | Colorimetry      | 5 - 10                               | 3.6                      | S2        |
| Fe-MOF                             | Colorimetry      | 30 - 485                             | 6                        | S3        |
| BSA-AuNCs                          | Colorimetry      | 2 - 50                               | 0.16                     | S4        |
| CoOOH-TMB                          | Colorimetry      | 0.5 - 50                             | 0.14                     | S5        |
| CoOOH-ABTS                         | Colorimetry      | 0.5 - 15                             | 0.16                     | S6        |
| CoOOH-OPD                          | Colorimetry      | 0.5 - 60                             | 0.43                     | S7        |
| CoOOH                              | TE               | 0.25 - 40                            | 0.012                    | This work |

TE, Tyndall Effect.

**Table S2** Determination of AA in vitamin C tablets.

| Sample           | Spiked<br>( $\mu\text{M}$ ) | Total found<br>( $\mu\text{M}$ ) | Recovery (%)<br>n=3 | RSD (%)<br>n=3 |
|------------------|-----------------------------|----------------------------------|---------------------|----------------|
| Vitamin C-tablet | 0.00                        | 0.70                             | /                   | 0.32           |
|                  | 5.00                        | 5.91                             | 104.2               | 7.17           |
|                  | 10.00                       | 10.13                            | 94.3                | 3.10           |

## Reference

- (1) Fan, S.; Zhao, M.; Ding, L.; Li, H.; Chen, S. Preparation of Co<sub>3</sub>O<sub>4</sub>/crumpled graphene microsphere as peroxidase mimetic for colorimetric assay of ascorbic acid. *Biosensors and Bioelectronics* **2017**, *89*, 846-852.
- (2) Darabdhara, G.; Sharma, B.; Das, M. R.; Boukherroub, R.; Szunerits, S. Cu-Ag bimetallic nanoparticles on reduced graphene oxide nanosheets as peroxidase mimic for glucose and ascorbic acid detection. *Sensors and Actuators B: Chemical* **2017**, *238*, 842-851.
- (3) Zhang, J.-W.; Zhang, H.-T.; Du, Z.-Y.; Wang, X.; Yu, S.-H.; Jiang, H.-L. Water-stable metal-organic frameworks with intrinsic peroxidase-like catalytic activity as a colorimetric biosensing platform. *Chemical Communications* **2014**, *50*, 1092-1094.
- (4) Yang, X.-H.; Ling, J.; Peng, J.; Cao, Q.-E.; Wang, L.; Ding, Z.-T.; Xiong, J. Catalytic formation of silver nanoparticles by bovine serum albumin protected-silver nanoclusters and its application for colorimetric detection of ascorbic acid. *Spectrochimica Acta Part A: Molecular and Biomolecular Spectroscopy* **2013**, *106*, 224-230.
- (5) Ji, D.; Du, Y.; Meng, H.; Zhang, L.; Huang, Z.; Hu, Y.; Li, J.; Yu, F.; Li, Z. A novel colorimetric strategy for sensitive and rapid sensing of ascorbic acid using cobalt oxyhydroxide nanoflakes and 3, 3', 5, 5' -tetramethylbenzidine. *Sensors and Actuators B: Chemical* **2018**, *256*, 512-519.
- (6) Fang, X.; Wang, J.; Cui, X.; Zhang, Y.; Zhu, R.; Zhao, H.; Li, Z. Sensitive and facile colorimetric sensing strategy for ascorbic acid determination based on CoOOH nanoflakes-ABTs oxidative system. *Colloids and Surfaces A: Physicochemical and Engineering Aspects* **2019**, *575*, 66-74.
- (7) Liu, S.; Han, L.; Li, N.; Xiao, N.; Ju, Y.; Li, N.; Luo, H. A fluorescence and colorimetric dual-mode assay of alkaline phosphatase activity via destroying oxidase-like CoOOH nanoflakes. *Journal of Materials Chemistry B* **2018**, *6*, 2843-2850.
